# Supplementary material
Source: PubMed Central journal article supplement (PMC10830887)
Supplement: NIHMS1917507-supplement-Supplemental_Digital_Content_to_Be_Published__cited_in_text_.pdf [file NIHMS1917507-supplement-Supplemental_Digital_Content_to_Be_Published__cited_in_text_.pdf]

Supplementary Data

|                                                 | AT1R-Ab and ETAR-Ab Negative<br>N=40* | AT1R-Ab and/or ETAR-Ab Positive<br>N=56* | P-Value | AT1R-Ab and ETAR-Ab Negative<br>N=34* | De Novo AT1R-Ab and/or ETAR-Ab<br>N=21* | Preformed AT1R-Ab and/or ETAR-Ab<br>N=27* | P-Value      |
|-------------------------------------------------|---------------------------------------|------------------------------------------|---------|---------------------------------------|-----------------------------------------|-------------------------------------------|--------------|
| <b>IF/TA</b>                                    |                                       |                                          | 0.753   |                                       |                                         |                                           | 0.472        |
| <b>None</b>                                     | 19 (47.5%)                            | 24 (42.1%)                               |         | 16 (47.1%)                            | 11 (52.4%)                              | 11 (39.3%)                                |              |
| <b>Mild</b>                                     | 12 (30.0%)                            | 23 (40.4%)                               |         | 10 (29.4%)                            | 8 (38.1%)                               | 10 (35.7%)                                |              |
| <b>Moderate</b>                                 | 7 (17.5%)                             | 8 (14.0%)                                |         | 6 (17.6%)                             | 1 (4.8%)                                | 7 (25.0%)                                 |              |
| <b>Severe</b>                                   | 2 (5.0%)                              | 2 (3.5%)                                 |         | 2 (5.9%)                              | 1 (4.8%)                                | 0 (0.0%)                                  |              |
| <b>Glomerulitis (g)</b>                         | 2 (5.0%)                              | 10 (17.9%)                               | 0.118   | 1 (2.9%)                              | 6 (28.6%)                               | 4 (14.8%)                                 | <b>0.025</b> |
| <b>Tubulitis (t)</b>                            | 15 (37.5%)                            | 30 (53.6%)                               | 0.178   | 12 (35.3%)                            | 11 (52.4%)                              | 15 (55.6%)                                | 0.235        |
| <b>Interstitial Inflammation (i)</b>            | 15 (37.5%)                            | 29 (51.8%)                               | 0.239   | 12 (35.3%)                            | 10 (47.6%)                              | 14 (51.9%)                                | 0.400        |
| <b>Intimal Arteritis (v)</b>                    | 0 (0.0%)                              | 5 (8.9%)                                 | 0.073   | 0 (0.0%)                              | 2 (9.5%)                                | 3 (11.1%)                                 | 0.102        |
| <b>Peritubular Capillaritis (ptc)</b>           | 6 (15.0%)                             | 15 (26.8%)                               | 0.26    | 6 (17.6%)                             | 5 (23.8%)                               | 9 (33.3%)                                 | 0.365        |
| <b>Chronic Glomerulopathy (cg)</b>              | 0 (0.0%)                              | 2 (3.6%)                                 | 0.509   | 0 (0.0%)                              | 2 (9.5%)                                | 0 (0.0%)                                  | 0.064        |
| <b>Mesangial Matrix Expansion (mm)</b>          | 1 (2.5%)                              | 2 (3.6%)                                 | 1       | 1 (2.9%)                              | 2 (9.5%)                                | 0 (0.0%)                                  | 0.262        |
| <b>Tubular Atrophy (ct)</b>                     | 16 (40.0%)                            | 31 (55.4%)                               | 0.202   | 13 (38.2%)                            | 10 (47.6%)                              | 15 (55.6%)                                | 0.400        |
| <b>Interstitial Fibrosis (ci)</b>               | 16 (40.0%)                            | 29 (51.8%)                               | 0.351   | 13 (38.2%)                            | 10 (47.6%)                              | 15 (55.6%)                                | 0.400        |
| <b>Arterial Fibrous Intimal Thickening (cv)</b> | 6 (15.0%)                             | 10 (17.9%)                               | 0.926   | 6 (17.6%)                             | 2 (9.5%)                                | 6 (22.2%)                                 | 0.572        |
| <b>Arteriolar Hyalinosis Thickening (ah)</b>    | 4 (10.0%)                             | 6 (10.7%)                                | 1       | 4 (11.8%)                             | 2 (9.5%)                                | 3 (11.1%)                                 | 1.000        |

\*1 antibody negative and 3 antibody positive patients missing biopsy scores.

**S1: Biopsy Scores by AT1R-Ab and/or ETAR-Ab Status**

| Predictor                                     | Estimate                     | 95% CI Lower | 95% CI Upper | P-value          | Estimate                     | 95% CI Lower | 95% CI Upper | P-value          |
|-----------------------------------------------|------------------------------|--------------|--------------|------------------|------------------------------|--------------|--------------|------------------|
| <b>Model 1:</b>                               | 2 Years Post-Transplantation |              |              |                  | 5 Years Post-Transplantation |              |              |                  |
| Months Post Transplant                        | 0.13                         | -0.34        | 0.59         | 0.593            | -0.16                        | -0.34        | 0.01         | 0.072            |
| Ever AT1R-Ab and/or ETAR-Ab Positive          | 7.98                         | -1.13        | 17.09        | 0.086            | 4.08                         | -4.22        | 12.39        | 0.335            |
| Ever AT1R-Ab and/or ETAR-Ab Positive*         |                              |              |              |                  |                              |              |              |                  |
| Months Post-Transplant                        | -0.71                        | -1.31        | -0.11        | <b>0.020</b>     | -0.08                        | -0.31        | 0.15         | 0.488            |
| Age (+1 Year)                                 | -1.43                        | -2.24        | -0.61        | <b>0.001</b>     | -1.18                        | -1.97        | -0.40        | <b>0.003</b>     |
| Female                                        | 0.40                         | -7.90        | 8.71         | 0.924            | -0.52                        | -8.49        | 7.45         | 0.898            |
| IL-2 Inhibitor vs. ATG                        | -7.62                        | -20.10       | 4.86         | 0.232            | -5.62                        | -17.79       | 6.56         | 0.366            |
| Steroids at Baseline                          | 0.53                         | -7.92        | 8.98         | 0.902            | 2.89                         | -5.19        | 10.96        | 0.483            |
| HLA Mismatches Out of 8                       | -0.29                        | -2.37        | 1.79         | 0.784            | -0.29                        | -2.30        | 1.72         | 0.779            |
| <b>Model 2:</b>                               |                              |              |              |                  |                              |              |              |                  |
| Months Post Transplant                        | 0.17                         | -0.22        | 0.56         | 0.382            | -0.18                        | -0.36        | 0.00         | 0.055            |
| De Novo AT1R-Ab and/or ETAR-Ab vs. Negative   | 7.02                         | -4.10        | 18.14        | 0.216            | 2.75                         | -7.23        | 12.73        | 0.59             |
| Preformed AT1R-Ab and/or ETAR-Ab vs. Negative | 5.73                         | -4.96        | 16.43        | 0.293            | 1.11                         | -8.58        | 10.80        | 0.822            |
| De Novo AT1R-Ab and/or ETAR-Ab *              |                              |              |              |                  |                              |              |              |                  |
| Months Post-Transplant                        | -0.69                        | -1.31        | -0.07        | <b>0.029</b>     | -0.15                        | -0.43        | 0.14         | 0.311            |
| Preformed AT1R-Ab and/or ETAR-Ab *            |                              |              |              |                  |                              |              |              |                  |
| Months Post-Transplant                        | -0.54                        | -1.11        | 0.02         | 0.06             | 0.04                         | -0.21        | 0.30         | 0.741            |
| Age (+1 Year)                                 | -1.82                        | -2.73        | -0.91        | <b>&lt;0.001</b> | -1.68                        | -2.55        | -0.80        | <b>&lt;0.001</b> |
| Female                                        | 0.76                         | -7.43        | 8.95         | 0.855            | 0.34                         | -7.61        | 8.29         | 0.934            |
| IL-2 Inhibitor vs. ATG                        | -15.19                       | -29.38       | -1.00        | <b>0.036</b>     | -13.86                       | -27.78       | 0.05         | 0.051            |
| Steroids at Baseline                          | -0.73                        | -9.57        | 8.11         | 0.871            | 1.26                         | -7.15        | 9.68         | 0.769            |
| HLA Mismatches Out of 8                       | 1.77                         | -0.40        | 3.93         | 0.11             | 1.80                         | -0.30        | 3.91         | 0.093            |

**Table S2: eGFR Models for Slope of eGFR (variable \*time in months post-transplant) at 2- and 5-Years Post-Transplantation**

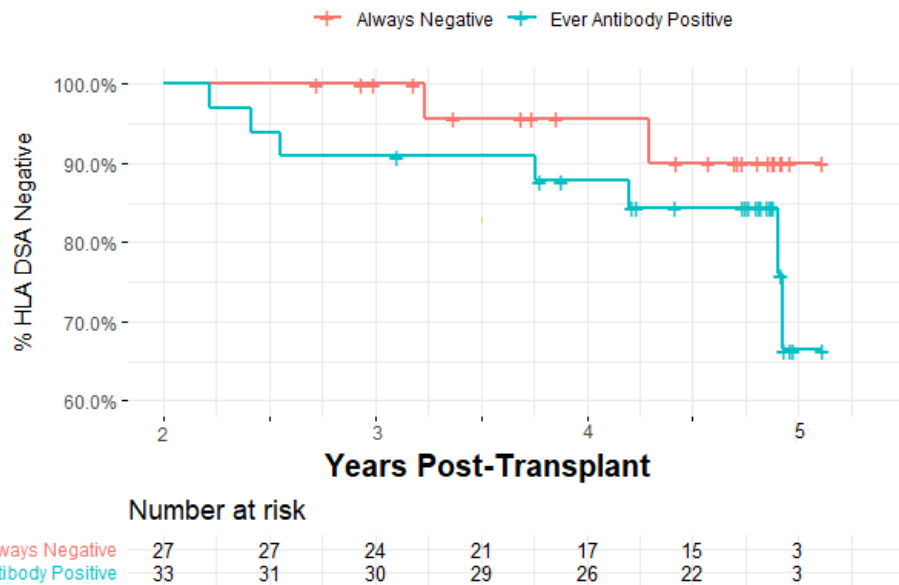

| Predictor                            | HR   | 95% CI Lower | 95% CI Upper | P-value |
|--------------------------------------|------|--------------|--------------|---------|
| Ever AT1R-Ab and/or ETAR-Ab Positive | 3.28 | 0.64         | 16.82        | 0.155   |
| Age (+1 year)                        | 1.07 | 0.88         | 1.31         | 0.477   |
| Female                               | 1.40 | 0.32         | 6.11         | 0.654   |
| Steroids at Baseline                 | 1.11 | 0.26         | 4.82         | 0.889   |
| HLA Mismatch (out of 8)              | 1.10 | 0.78         | 1.55         | 0.593   |

**Figure S1: Survival Analysis for Development of HLA DSA between 2-5 Years Post-Transplantation.** Patients who were HLA DSA negative at 2 years post-transplant were analyzed for likelihood of developing HLA DSA between 2 and 5 years post-transplant based on AT1R-Ab and/or ETAR-Ab status in the first 2 years post-transplant (indexed at 26.5 months based on timing of study samples). This relationship was not statistically significant ( $p=0.23$  in unadjusted model and  $0.155$  in model adjusted for Age, Sex, Steroid Use, and HLA Mismatch).
